# Supplementary material for: Relationship of pain and fatigue with health-related quality of life and work in patients with psoriatic arthritis on TNFi: results of a multi-national real-world study
Source: PubMed Central journal article supplement — RMD Open. 2020 Jun 30;6(2):e001240. doi: 10.1136/rmdopen-2020-001240 (PMC7425192; doi:10.1136/rmdopen-2020-001240), 2020-06-30
Supplement: rmdopen-2020-001240s001.pdf [file rmdopen-2020-001240s001.pdf]

## Supplementary Tables

**Supplementary Table 1.** Patient demographics and baseline characteristics of all available patients receiving a TNFi  $\geq 3$  months by inclusion status and geographical region

|                                           | Overall<br>(n=1475) | Not<br>included<br>(n=835) | Included         |                      |                |                |                |
|-------------------------------------------|---------------------|----------------------------|------------------|----------------------|----------------|----------------|----------------|
|                                           |                     |                            | Total<br>(n=640) | N America<br>(n=176) | EU5<br>(n=329) | APAC<br>(n=97) | T&ME<br>(n=38) |
| <b>Age, years</b>                         |                     |                            |                  |                      |                |                |                |
| Mean (SD)                                 | 48.9 (11.5)         | 48.9 (11.5)                | 48.4 (11.6)      | 45.8 (12.6)          | 49.7 (11.5)    | 48.9 (12.3)    | 38.6 (5.8)     |
| <65, n (%)                                | 1323 (89.7)         | 750 (89.8)                 | 573 (89.5)       |                      |                |                |                |
| <b>Male, n (%)</b>                        | 810 (54.9)          | 453 (54.3)                 | 357 (55.8)       | 103 (58.5)           | 180 (54.7)     | 57 (58.8)      | 17 (44.7)      |
| <b>BMI, mean (SD) kg/m<sup>2</sup></b>    | 26.7 (4.7)          | 27 (4.8)                   | 26.3 (4.6)       | 28.1 (5.6)           | 25.9 (3.8)     | 24.4 (4.6)     | 26.4 (2.0)     |
| <b>Patient region, n (%)</b>              |                     |                            |                  |                      |                |                |                |
| N America                                 | 462 (31.3)          | 286 (34.4)                 | 176 (27.5)       |                      |                |                |                |
| EU5                                       | 780 (52.9)          | 451 (54.0)                 | 329 (51.4)       |                      |                |                |                |
| APAC                                      | 172 (11.7)          | 75 (9.0)                   | 97 (15.2)        |                      |                |                |                |
| T&ME                                      | 61 (4.1)            | 23 (2.8)                   | 38 (5.9)         |                      |                |                |                |
| <b>Time since symptom onset (years)</b>   |                     |                            |                  |                      |                |                |                |
|                                           | <b>(n=1183)</b>     | <b>(n=652)</b>             | <b>(n=531)</b>   | <b>(n=147)</b>       | <b>(n=268)</b> | <b>(n=78)</b>  | <b>(n=38)</b>  |
| Mean (SD)                                 | 7.9 (7.4)           | 7.8 (7.4)                  | 7.9 (7.5)        | 7.8 (6.8)            | 9.1 (8.0)      | 6.7 (7.1)      | 2.1 (1.1)      |
| <b>Time since diagnosis (years)</b>       |                     |                            |                  |                      |                |                |                |
|                                           | <b>(n=1281)</b>     | <b>(n=710)</b>             | <b>(n=571)</b>   | <b>(n=158)</b>       | <b>(n=292)</b> | <b>(n=83)</b>  | <b>(n=38)</b>  |
| Mean (SD)                                 | 6.2 (6.2)           | 6.1 (6.0)                  | 6.3 (6.4)        | 6.4 (6.3)            | 7.3 (6.8)      | 5.1 (5.1)      | 1.3 (1.1)      |
| <b>Presence of psoriasis, n (%)</b>       | 1421 (96.3)         | 801 (95.9)                 | 620 (96.9)       | 172 (97.7)           | 314 (95.4)     | 96 (99.0)      | 38 (100.0)     |
| <b>% BSA psoriasis</b>                    |                     |                            |                  |                      |                |                |                |
|                                           | <b>(n=1118)</b>     | <b>(n=620)</b>             | <b>(n=498)</b>   | <b>(n=148)</b>       | <b>(n=228)</b> | <b>(n=84)</b>  | <b>(n=38)</b>  |
| Mean (SD)                                 | 8.4 (11.4)          | 7.8 (11.6)                 | 9.1 (11.2)       | 9.8 (12.5)           | (8.7 (9.4)     | 10.9 (14.4)    | 4.9 (5.3)      |
| <b>Comorbid fibromyalgia<sup>a</sup></b>  |                     |                            |                  |                      |                |                |                |
|                                           | <b>(n=1321)</b>     | <b>(n=681)</b>             | <b>(n=640)</b>   | <b>(n=176)</b>       | <b>(n=329)</b> | <b>(n=97)</b>  | <b>(n=38)</b>  |
| n (%)                                     | 53 (4.0)            | 30 (4.4)                   | 23 (3.6)         | 8.0 (4.5)            | 9.0 (2.7)      | 3.0 (3.1)      | 3.0 (7.9)      |
| <b>HLA-B27</b>                            |                     |                            |                  |                      |                |                |                |
|                                           | <b>(n=524)</b>      | <b>(n=288)</b>             | <b>(n=236)</b>   | <b>(n=59)</b>        | <b>(n=130)</b> | <b>(n=20)</b>  | <b>(n=27)</b>  |
| +ve, n (%)                                | 174 (33.2)          | 82 (28.5)                  | 92 (39.0)        | 21 (35.6)            | 40 (30.8)      | 7 (35.0)       | 24 (88.9)      |
| <b>Number of TNFiever received, n (%)</b> |                     |                            |                  |                      |                |                |                |

|                                                |                 |                |                |                |                |               |               |
|------------------------------------------------|-----------------|----------------|----------------|----------------|----------------|---------------|---------------|
| 1                                              | 1239 (84.0)     | 706 (84.6)     | 533 (83.3)     | 138 (78.4)     | 268 (81.5)     | 90 (92.8)     | 37 (97.4)     |
| 2                                              | 137 (9.3)       | 76 (9.1)       | 61 (9.5)       | 19 (10.8)      | 40 (12.2)      | 2 (2.1)       | -             |
| 3+                                             | 40 (2.7)        | 22 (2.6)       | 18 (2.8)       | 9 (5.1)        | 6 (1.8)        | 2 (2.1)       | 1 (2.6)       |
| Unknown                                        | 59 (4.0)        | 31 (3.7)       | 28 (4.4)       | 10 (5.7)       | 15 (4.6)       | 3 (3.1)       | -             |
| <b>Current severity<sup>a</sup>, n (%)</b>     |                 |                |                |                |                |               |               |
| Mild                                           | 1046 (70.9)     | 611 (73.2)     | 435 (68.0)     | 117 (66.5)     | 210 (63.8)     | 73 (75.3)     | 35 (92.1)     |
| Moderate                                       | 372 (25.2)      | 190 (22.8)     | 182 (28.4)     | 56 (31.8)      | 103 (31.3)     | 22 (22.7)     | 1 (2.6)       |
| Severe                                         | 57 (3.9)        | 34 (4.1)       | 23 (3.6)       | 3 (1.7)        | 16 (4.9)       | 2 (2.1)       | 2 (5.3)       |
| <b>In remission<sup>a</sup>, n (%)</b>         | 846 (57.4)      | 497 (59.5)     | 349 (54.5)     | 70 (39.8)      | 210 (63.8)     | 33 (34.0)     | 36 (94.7)     |
| <b>Disease status<sup>a</sup>, n (%)</b>       | <b>(n=1467)</b> | <b>(n=828)</b> | <b>(n=639)</b> | <b>(n=176)</b> | <b>(n=328)</b> | <b>(n=97)</b> | <b>(n=38)</b> |
| Stable/improving                               | 1,352 (92.2)    | 768 (92.8)     | 584 (91.4)     | 154 (87.5)     | 305 (93.0)     | 88 (90.7)     | 37 (97.4)     |
| Unstable/deteriorating                         | 115 (7.8)       | 60 (7.2)       | 55 (8.6)       | 22 (12.5)      | 23 (7.0)       | 9 (9.3)       | 1 (2.6)       |
| <b>Current flare status<sup>a</sup>, n (%)</b> | <b>(n=1467)</b> | <b>(n=828)</b> | <b>(n=639)</b> | <b>(n=176)</b> | <b>(n=328)</b> | <b>(n=97)</b> | <b>(n=38)</b> |
| Never flared                                   | 895 (61.0)      | 522 (63.0)     | 373 (58.4)     | 100 (56.8)     | 182 (55.5)     | 68 (70.1)     | 23 (60.5)     |
| Flares, not current                            | 519 (35.4)      | 277 (33.5)     | 242 (37.9)     | 65 (36.9)      | 138 (42.1)     | 26 (26.8)     | 13 (34.2)     |
| Currently flaring                              | 53 (3.6)        | 29 (3.5)       | 24 (3.8)       | 11 (6.3)       | 8 (2.4)        | 3 (3.1)       | 2 (5.3)       |
| <b>ESR</b>                                     | <b>(n=565)</b>  | <b>(n=295)</b> | <b>(n=270)</b> | <b>(n=52)</b>  | <b>(n=141)</b> | <b>(n=41)</b> | <b>(n=35)</b> |
| Mean (SD)                                      | 15.7 (12.7)     | 16.0 (13.1)    | 15.4 (12.2)    | 18.4 (12.0)    | 15.0 (12.3)    | 13.4 (15.6)   | 15.2 (5.5)    |
| <b>CRP</b>                                     | <b>(n=530)</b>  | <b>(n=266)</b> | <b>(n=264)</b> | <b>(n=48)</b>  | <b>(n=140)</b> | <b>(n=41)</b> | <b>(n=35)</b> |
| Mean (SD)                                      | 5.0 (7.3)       | 5.2 (7.5)      | 4.8 (7.2)      | 2.7 (4.8)      | 6.3 (5.9)      | 3.0 (8.6)     | 3.7 (11.2)    |

<sup>a</sup>physician-reported.

**Abbreviations:** N America, the USA and Mexico; APAC, Asia Pacific Region; BMI, body mass index; BSA, body surface area; CRP, C-reactive protein; ESR, erythrocyte sedimentation rate; EU5, Europe; HLA-B27, human leucocyte antigen B27; SD, standard deviation; T&ME, Turkey & the Middle East; TNFi, tumor necrosis factor inhibitor.

**Supplementary Table 2.** Patient-reported quality of life and societal burden by region

|                                                                       | <b>N America</b> | <b>EU5</b>     | <b>APAC</b>   | <b>T&amp;ME</b> |
|-----------------------------------------------------------------------|------------------|----------------|---------------|-----------------|
|                                                                       | <b>(n=176)</b>   | <b>(n=329)</b> | <b>(n=97)</b> | <b>(n=38)</b>   |
| <b>SF-36v2<sup>a</sup>, Mean (SD)</b>                                 | <b>(n=176)</b>   | <b>(n=326)</b> | <b>(n=95)</b> | <b>(n=38)</b>   |
| Physical Functioning                                                  | 72.9 (26.5)      | 71.7 (28.3)    | 76.8 (22.4)   | 32.1 (14.4)     |
| Role Physical                                                         | 75.7 (25.1)      | 67.0 (28.2)    | 73.7 (24.7)   | 55.4 (16.1)     |
| Bodily Pain                                                           | 66.9 (22.7)      | 64.9 (25.5)    | 71.7 (23.1)   | 46.7 (15.4)     |
| General Health                                                        | 54.9 (23.4)      | 47.4 (20.4)    | 52.4 (19.1)   | 48.8 (5.5)      |
| Vitality                                                              | 60.4 (19.7)      | 52.7 (21.6)    | 58.1 (18.7)   | 47.1 (9.5)      |
| Social Functioning                                                    | 76.7 (23.2)      | 71.4 (24.5)    | 75.6 (24.2)   | 52.3 (14.2)     |
| Role Emotional                                                        | 79.5 (25.4)      | 71.6 (27.9)    | 75.3 (24.5)   | 51.8 (15.8)     |
| Mental Health                                                         | 71.1 (19.4)      | 64.6 (20.3)    | 66.4 (16.4)   | 45.9 (8.5)      |
| <b>EQ-5D-3L</b>                                                       | <b>(n=171)</b>   | <b>(n=322)</b> | <b>(n=94)</b> | <b>(n=38)</b>   |
| Mean (SD)                                                             | 0.799 (0.255)    | 0.769 (0.265)  | 0.853 (0.180) | 0.21 (0.263)    |
| <b>EQ-VAS</b>                                                         | <b>(n=176)</b>   | <b>(n=319)</b> | <b>(n=96)</b> | <b>(n=38)</b>   |
| Mean (SD)                                                             | 76.6 (16.7)      | 67.7 (20.1)    | 70.1 (18.9)   | 56.8 (11.7)     |
| <b>HAQ-DI</b>                                                         | <b>(n=172)</b>   | <b>(n=319)</b> | <b>(n=96)</b> | <b>(n=38)</b>   |
| Mean (SD)                                                             | 0.4 (0.6)        | 0.7 (0.8)      | 0.4 (0.6)     | 1.4 (0.4)       |
| <b>Current employment status among patients of working age, n (%)</b> | <b>(n=154)</b>   | <b>(n=270)</b> | <b>(n=83)</b> | <b>(n=38)</b>   |
| Employed/Student/Homemaker                                            | 134 (87.0)       | 213 (78.9)     | 75 (90.4)     | 36 (94.7)       |
| Unemployed/retired due to condition                                   | 2 (1.3)          | 20 (7.4)       | 3 (3.6)       | -               |
| Unemployed/retired not due to condition or unspecified                | 18 (11.7)        | 37 (13.7)      | 5 (6.0)       | 2 (5.3)         |
| <b>WPAI<sup>a</sup>, Mean (SD)</b>                                    | <b>(n=107)</b>   | <b>(n=141)</b> | <b>(n=54)</b> | <b>(n=17)</b>   |
| % Overall Work Impairment                                             | 21.3 (24.6)      | 26.5 (23.8)    | 24.8 (21.0)   | 73.1 (10.1)     |
| % Presenteeism                                                        | 19.7 (22.8)      | 22.1 (20.7)    | 24.3 (20.7)   | 68.2 (11.9)     |
| % Absenteeism                                                         | 6.1 (20.1)       | 9.4 (20.6)     | 0.8 (2.6)     | 15.0 (5.6)      |
| <b>WPAI, Mean (SD)</b>                                                | <b>(n=173)</b>   | <b>(n=319)</b> | <b>(n=93)</b> | <b>(n=38)</b>   |
| % Activity Impairment                                                 | 28.3 (26.9)      | 31.4 (26.7)    | 27.3 (24.5)   | 67.9 (11.7)     |

<sup>a</sup>Base varies by domain, minimum base shown.

**Abbreviations:** N America, the USA and Mexico; APAC, Asia Pacific Region; EQ-5D-3L, 3 level version of 5 dimension EuroQol questionnaire; EQ-VAS, EuroQol visual analogue scale; EU5, Europe; HAQ-DI, Health Assessment Questionnaire Disability Index; SD, standard deviation; SF-36v2, Medical Outcomes Study 36-Item Short-Form version 2; T&ME, Turkey & the Middle East; WPAI, Work Productivity and Activity Impairment questionnaire.
